# Supplementary material
Source: publisher site journal article supplement (https://www.dovepress.com/article/255184)
Supplement: Supplementary file 1 [file get_supplementary_file.php]

**Supplementary data**

**Table 1:** Radiologic and ophthalmologic finding in the NF1 group. NF1= neurofibromatosis type 1; UBOs= unidentified bright objects.

| NF1 patients | Lisch's nodules | Café-au-lait spots | Vascular tortuosity | Neurofibromas | Choroidal nodules | | UBOs | UBOs Location |
| --- | --- | --- | --- | --- | --- | --- | --- | --- |
|  | 1=yes 2=no | 1=yes 2=no | 1=yes 2=no | 1=yes 2=no | Right Eye | Left Eye | 1=yes; 2=no |  |
| 1 | 1 | 1 | 2 | 2 | 2 | 2 | 1 | Talamus, parahippocampal gyrus and dentate nucleus |
| 2 | 1 | 1 | 1 | 1 | >6 | 6 | 1 | Not specified |
| 3 | 1 | 1 | 1 | 1 | 5 | >6 | 2 |  |
| 4 | 1 | 1 | 2 | 1 | >6 | >6 | 1 | Midbrain, cerebral peduncle, talamus and internal capsule |
| 5 | 1 | 1 >50 | 2 | 2 | >6 | >6 | 1 | Paratrigonal |
| 6 | 1 | 1 | 2 | 1 | >6 | >6 | 2 |  |
| 7 | 1 | 1 | 2 | 1 | 0 | 0 | 2 |  |
| 8 | 2 | 1 | 1 | 1 | 3 | 6 | 2 |  |
| 9 | 1 | 1 | 2 | 1 | 1 | 3 | 2 |  |
| 10 | 1 | 1 | 2 | 1 | >6 | >6 | 1 | Pons, globus pallidus, internal capsule, splenium and corpus callosum |
| 11 | 1 | 1 >20 | 2 | 1 >1000 | >6 | >6 | 2 |  |
| 12 | 1 | 1 | 2 | 1 | >6 | <6 | 2 |  |
| 13 | 1 | 1 | 1 | 2 | 4 | 2 | 1 | Periventricular white matter |
| 14 | 1 | 1 | 1 | 1 | >6 | >6 | 1 | Not specified |
| 15 | 1 | 1 | 2 | 1 | 4 | 3 | 2 |  |
| 16 | 1 | 1 | 2 | 1 | >6 | >6 | 2 |  |
| 17 | 1 | 1 | 2 | 1 | >6 | >6 | 2 |  |
| 18 | 1 | 1 | 2 | 1 >300 | 4 | 3 | 2 |  |
| 19 | 1 | 1 | 2 | 1 | >6 | >6 | 2 |  |
| 20 | 1 | 1 | 2 | 1 | 1 | >6 | 1 | Not specified |
| 21 | 1 | 1 | 2 | 1 | >6 | >6 | 1 | Cerebellum |
| 22 | 1 | 1 | 2 | 1 | >6 | >6 | 2 |  |
| 23 | 1 | 1 | 2 | 1 | >6 | >6 | 2 |  |
| 24 | 1 | 1 | 1 | 1 | 3 | 2 | 2 |  |
| 25 | 1 | 1 | 2 | 1 | >6 | >6 | 2 |  |
| 26 | 2 | 1 | 2 | 1 | 3 | >6 | 2 |  |

**Table 2:** Electrophysiologic and perimetric findingsin the NF1 group. CS= Central Sensitivity; MD= Mean Deviation; PSD= Pattern Standard Deviation; pVEP= Pattern Visual Evoked Potentials. Amplitude expressed in micronvolts = μV and latency in milliseconds = ms.

| NF1 patients | Age | Gender | CS | MD | PSD | pVEP 120’ | | pVEP 60’ | | pVEP 15’ | |
| --- | --- | --- | --- | --- | --- | --- | --- | --- | --- | --- | --- |
|  |  |  | **Latency** | **Amplitude** | **Latency** | **Amplitude** | **Latency** | **Amplitude** |
| 1 | 17 | M | 27 | -3,23 | 5,17 | 150,5 | 5,85 | 119,5 | 6,4 | Not recordable | Not recordable |
| 2 | 45 | M | 29,5 | 1,02 | 3,25 | 108,5 | 7,85 | 108 | 9,2 | 117,5 | 10,5 |
| 3 | 45 | F | 29,5 | -5,07 | 3,95 | 108,5 | 6,6 | 114,5 | 7,5 | 140,5 | 4,1 |
| 4 | 18 | M | 29,5 | -2,37 | 4,57 | 119,5 | 8,65 | 116 | 5,8 | 129 | 8,2 |
| 5 | 36 | M | 19 | -13,96 | 6,75 | 111,5 | 7,15 | 104,5 | 8,6 | Not recordable | Not recordable |
| 6 | 48 | M | 33 | 1,36 | 2,31 | 112,5 | 11,4 | 108 | 13,0 | 109 | 11,2 |
| 7 | 32 | F | 29,5 | -2,17 | 5,38 | 147,5 | 9,9 | 141 | 7,2 | 121 | 8,7 |
| 8 | 35 | M | 20 | -5,50 | 4,57 | 156,95 | 8,05 | 149,5 | 8,9 | 159,5 | 6,7 |
| 9 | 18 | F | 29,5 | -6,44 | 4,91 | 137,5 | 6,5 | 184 | 6,1 | 115 | 4,2 |
| 10 | 24 | F | 29,5 | -1,62 | 3,54 | 114 | 8 | 107 | 8,8 | 111 | 10,2 |
| 11 | 60 | F | 29,5 | -2,36 | 3,46 | 106 | 11,55 | 108,5 | 13,4 | 120 | 19,8 |
| 12 | 54 | F | 27 | -5,36 | 5,01 | 122 | 3,75 | 124 | 3,1 | Not recordable | Not recordable |
| 13 | 18 | F | 27 | -6,11 | 6,35 | 102,5 | 12,65 | 98,15 | 11,4 | 113 | 13,0 |
| 14 | 32 | F | 23,5 | -5,28 | 3,51 | 122 | 21,1 | 119 | 16,5 | 121 | 13,6 |
| 15 | 29 | M | 27 | -6,97 | 6,16 | 111 | 8,5 | 104 | 7,0 | 109 | 6,8 |
| 16 | 52 | M | 20,5 | -5,23 | 4,45 | 117 | 5,75 | 118 | 5,7 | 121 | 5,1 |
| 17 | 35 | F | 29,5 | -5,39 | 3,85 | 113 | 8,45 | 118,5 | 9,2 | 113,5 | 11,8 |
| 18 | 55 | F | 32 | 1,155 | 2,67 | 112,5 | 14,65 | 111,5 | 16,9 | 111 | 18,1 |
| 19 | 47 | F | 22,5 | -2,56 | 3,45 | 102 | 9,85 | 107 | 8,8 | 114 | 11,3 |
| 20 | 23 | F | 30,5 | -3,93 | 4,78 | 108,5 | 7,8 | 116 | 7,7 | 118 | 7,25 |
| 21 | 47 | F | 29,5 | -8,27 | 5,22 | 104 | 13,45 | 107 | 14,4 | 116 | 14,3 |
| 22 | 26 | F | 35 | 2,43 | 3,49 | 106 | 14,35 | 105,5 | 15,2 | 108 | 20,9 |
| 23 | 42 | M | 34 | 2,34 | 3,72 | 125,5 | 9,4 | 119 | 8,6 | 135 | 4,9 |
| 24 | 33 | M | 25 | -5,78 | 4,30 | 111 | 15,25 | 110,5 | 12,7 | 114,5 | 16,1 |
| 25 | 39 | F | 25 | -4,82 | 2,93 | 113 | 9,95 | 111,5 | 9,7 | 116,5 | 8,7 |
| 26 | 51 | F | 25 | -4,29 | 3,86 | 115 | 8,05 | 108,5 | 10,8 | 117 | 12,1 |

**Table 3:** Electrophysiologic and perimetric findingsin the control group. CS= Central Sensitivity; MD= Mean Deviation; PSD= Pattern Standard Deviation; pVEP= Pattern Visual Evoked Potentials. Amplitude expressed in micronvolts = μV and latency in milliseconds = ms.

| Controls | Age | Gender | CS | MD | PSD | pVEP 120’ | | pVEP 60’ | | pVEP 15’ | |
| --- | --- | --- | --- | --- | --- | --- | --- | --- | --- | --- | --- |
|  |  |  |  |  |  | **Latency** | **Amplitude** | **Latency** | **Amplitude** | **Latency** | **Amplitude** |
| 1 | 26 | F | 29,5 | 0,91 | 3,05 | 110 | 14,6 | 107,5 | 13,2 | 122 | 16,2 |
| 2 | 44 | F | 27 | -2,09 | 3,63 | 107 | 23,6 | 103 | 17,1 | 112 | 20,4 |
| 3 | 49 | F | 32 | 2,83 | 2,35 | 104,5 | 15,4 | 103 | 17,2 | 106,5 | 16,1 |
| 4 | 69 | F | 32 | 2,78 | 2,75 | 110 | 7,3 | 109 | 13,2 | 114 | 25,6 |
| 5 | 20 | F | 36 | 2,34 | 2,58 | 105 | 20,2 | 104,5 | 23,8 | 114 | 25,2 |
| 6 | 49 | F | 33 | 0,635 | 2,37 | 91 | 15,1 | 97 | 14,4 | 108,5 | 16,0 |
| 7 | 48 | F | 27 | -2,88 | 2,76 | 110 | 11,3 | 111 | 12,7 | 111,5 | 10,1 |
| 8 | 27 | M | 27 | -0,22 | 3,22 | 106,5 | 26 | 105 | 24,5 | 104 | 11,2 |
| 9 | 14 | F | 33 | 0,55 | 3,29 | 106,5 | 16,8 | 103 | 21,7 | 102,5 | 18,7 |
| 10 | 47 | M | 35 | 2,27 | 2,24 | 109,5 | 8,1 | 111,5 | 9,4 | 123,5 | 11,7 |
| 11 | 72 | F | 32 | -0,51 | 3,43 | 114 | 11,8 | 108,5 | 11,6 | 121,5 | 22,3 |
| 12 | 34 | F | 34 | 0,77 | 2,84 | 106,5 | 11,4 | 107 | 14,8 | 111,5 | 10,5 |
| 13 | 40 | F | 34 | 1,33 | 3,24 | 108 | 21,2 | 107 | 21,1 | 110,5 | 22,8 |
| 14 | 16 | F | 29,5 | 0,41 | 2,44 | 107 | 27,3 | 105 | 26,5 | 117 | 23,9 |
| 15 | 48 | M | 32 | 1,15 | 2,27 | 96,5 | 12,3 | 97,5 | 13,8 | 109 | 17,3 |
| 16 | 23 | M | 34 | 1,68 | 2,55 | 109,5 | 10,6 | 108 | 8,7 | 115 | 10,1 |
| 17 | 66 | M | 29,5 | -1,11 | 2,95 | 104,5 | 6,3 | 106,5 | 10,3 | 119,5 | 7,0 |
